# Supplementary material for: NEUROD1 reinforces endocrine cell fate acquisition in pancreatic development
Source: PubMed Central journal article supplement (PMC10492842; doi:10.1038/s41467-023-41306-6), 2023-09-09
Supplement: 41467_2023_41306_MOESM1_ESM.pdf [file 41467_2023_41306_MOESM1_ESM.pdf]

# Supplementary information

## NEUROD1 reinforces endocrine cell fate acquisition in pancreatic development

Romana Bohuslavova<sup>1\*</sup>, Valeria Fabriciova<sup>1\*</sup>, Ondrej Smolik<sup>1\*</sup>, Laura Lebrón-Mora<sup>1</sup>, Pavel Abaffy<sup>2</sup>, Sarka Benesova<sup>2</sup>, Daniel Zucha<sup>2</sup>, Lukas Valihrach<sup>2</sup>, Zuzana Berkova<sup>3</sup>, Frantisek Saudek<sup>3</sup>, and Gabriela Pavlinkova<sup>1</sup>

<sup>1</sup>Laboratory of Molecular Pathogenetics, Institute of Biotechnology CAS, 25250 Vestec, Czechia

<sup>2</sup>Laboratory of Gene Expression, Institute of Biotechnology CAS, 25250 Vestec, Czechia

<sup>3</sup>Diabetes Centre, Institute for Clinical and Experimental Medicine, 14021 Prague, Czechia

Correspondence should be addressed to G.P. (email: [gpavlinkova@ibt.cas.cz](mailto:gpavlinkova@ibt.cas.cz))

### Table of contents

1. Supplementary Figures 1 to 5
2. Supplementary Tables 1 to 6

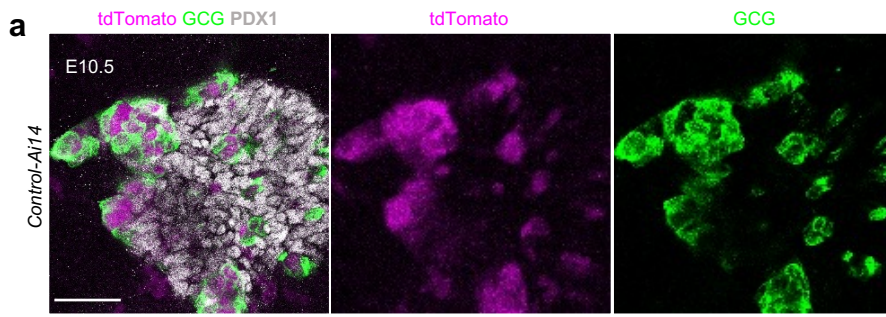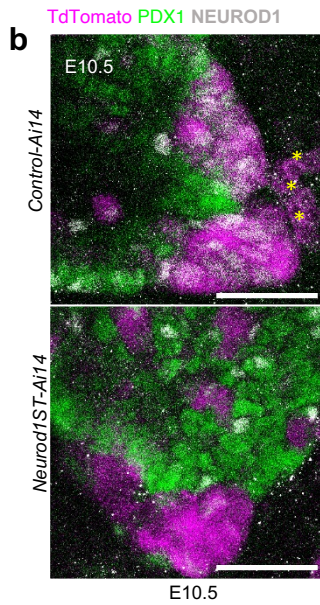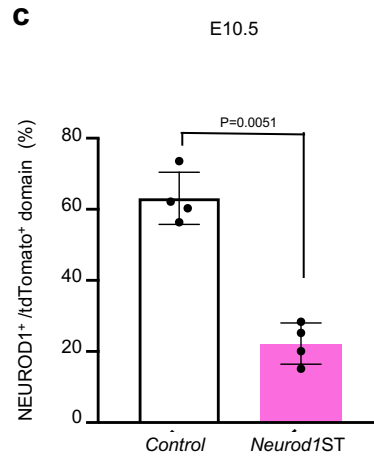

**Supplementary Figure 1. Efficient deletion of NEUROD1 in the E10.5 pancreas of *Neurod1ST*.** **a** Representative confocal images of early endocrine cell clusters co-expressing tdTomato and glucagon (GCG) in the E10.5 dorsal pancreatic bud of *Control-Ai14* embryos (genotype *Neurod1*<sup>loxP/+</sup>; *Neurod1*<sup>Cre/+</sup>; *Ai14*). The dorsal pancreatic bud is visualized by whole-mount immunohistochemistry staining of PDX1 (a marker of pancreatic multipotent progenitors). **b** A detail of the endocrine cell clusters with the co-expression of tdTomato and NEUROD1 in the E10.5 *Control-Ai14* and *Neurod1ST-Ai14* pancreas of whole-mount immunohistochemistry staining. *Neurod1ST-Ai14* pancreases at E10.5. Note, the reduction of NEUROD1 expression in tdTomato domain of *Neurod1ST-Ai14* (genotype *Neurod1*<sup>loxP/loxP</sup>; *Neurod1*<sup>Cre/+</sup>; *Ai14*). Asterisks indicate red blood cells. **c** Semi-quantitative measurements of NEUROD1 protein in the tdTomato<sup>+</sup> domain of *Control* and *Neurod1ST* was performed using the thresholding tool of the ImageJ. Data are presented as mean ± SD (n = 4 pancreases/genotype); unpaired two-tailed *t*-test. Source data are provided as a Source Data file. Scale bars, 50 μm.

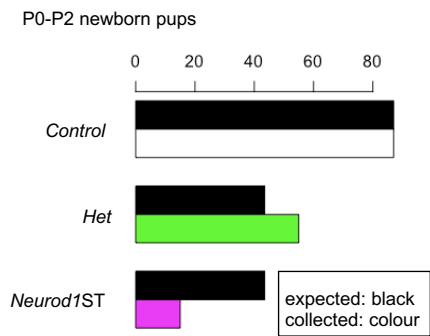

**Supplementary Figure 2. Reduced survival of *Neurod1ST*.** Bar plot presenting the distribution of genotypes of collected newborn pups at P0-P2. The expected Mendelian ratio is indicated (black). Source data are provided as a Source Data file.

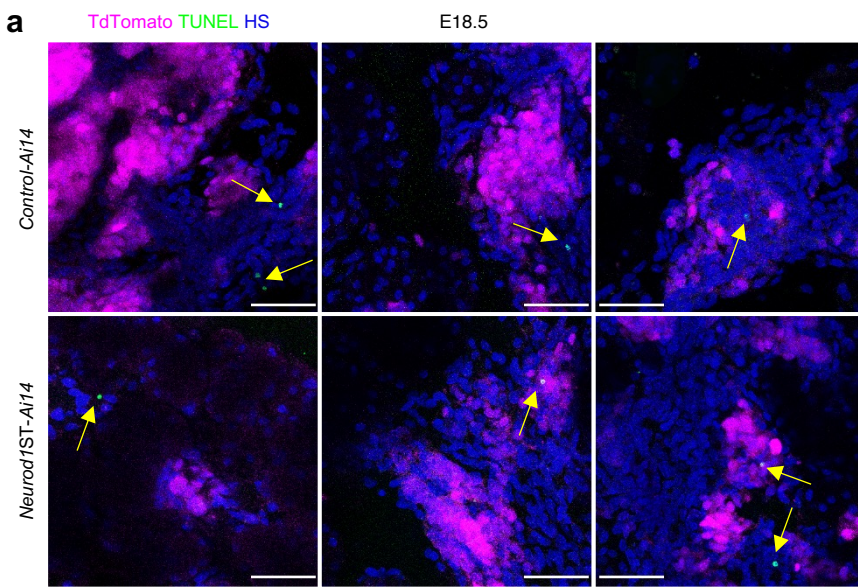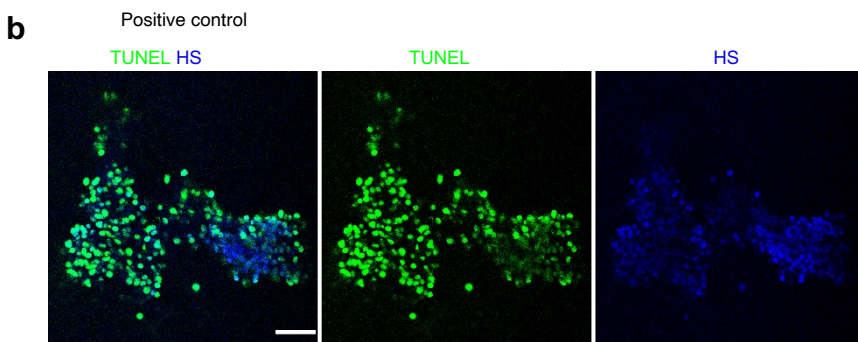

**Supplementary Figure 3. TUNEL analysis shows a similar level of apoptosis in the control and mutant pancreas. a** Representative images of apoptotic cells stained by TUNEL and tdTomato<sup>+</sup> endocrine cells in the sections of pancreases at E18.5. Nuclei were stained using Hoechst (HS). Arrows indicate cells that were positive for TUNEL. **b** Positive control for TUNEL assay. Scale bars, 50  $\mu$ m.

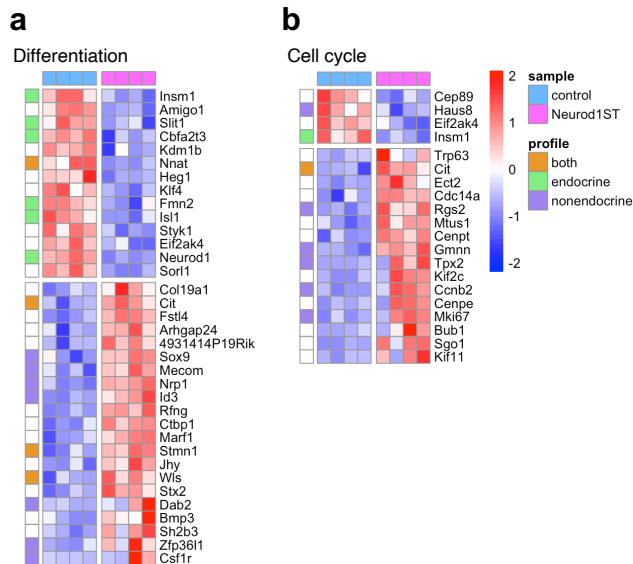

**Supplementary Figure 4. Transcriptome changes in *Neurod1ST* based on bulk-cell RNA-seq.**  
**a** Heatmap of differentially expressed genes within differentiation-related gene cluster assembled by DAVID tool. **b** Heatmap of differentially expressed genes within cell cycle-related gene cluster assembled by DAVID tool.

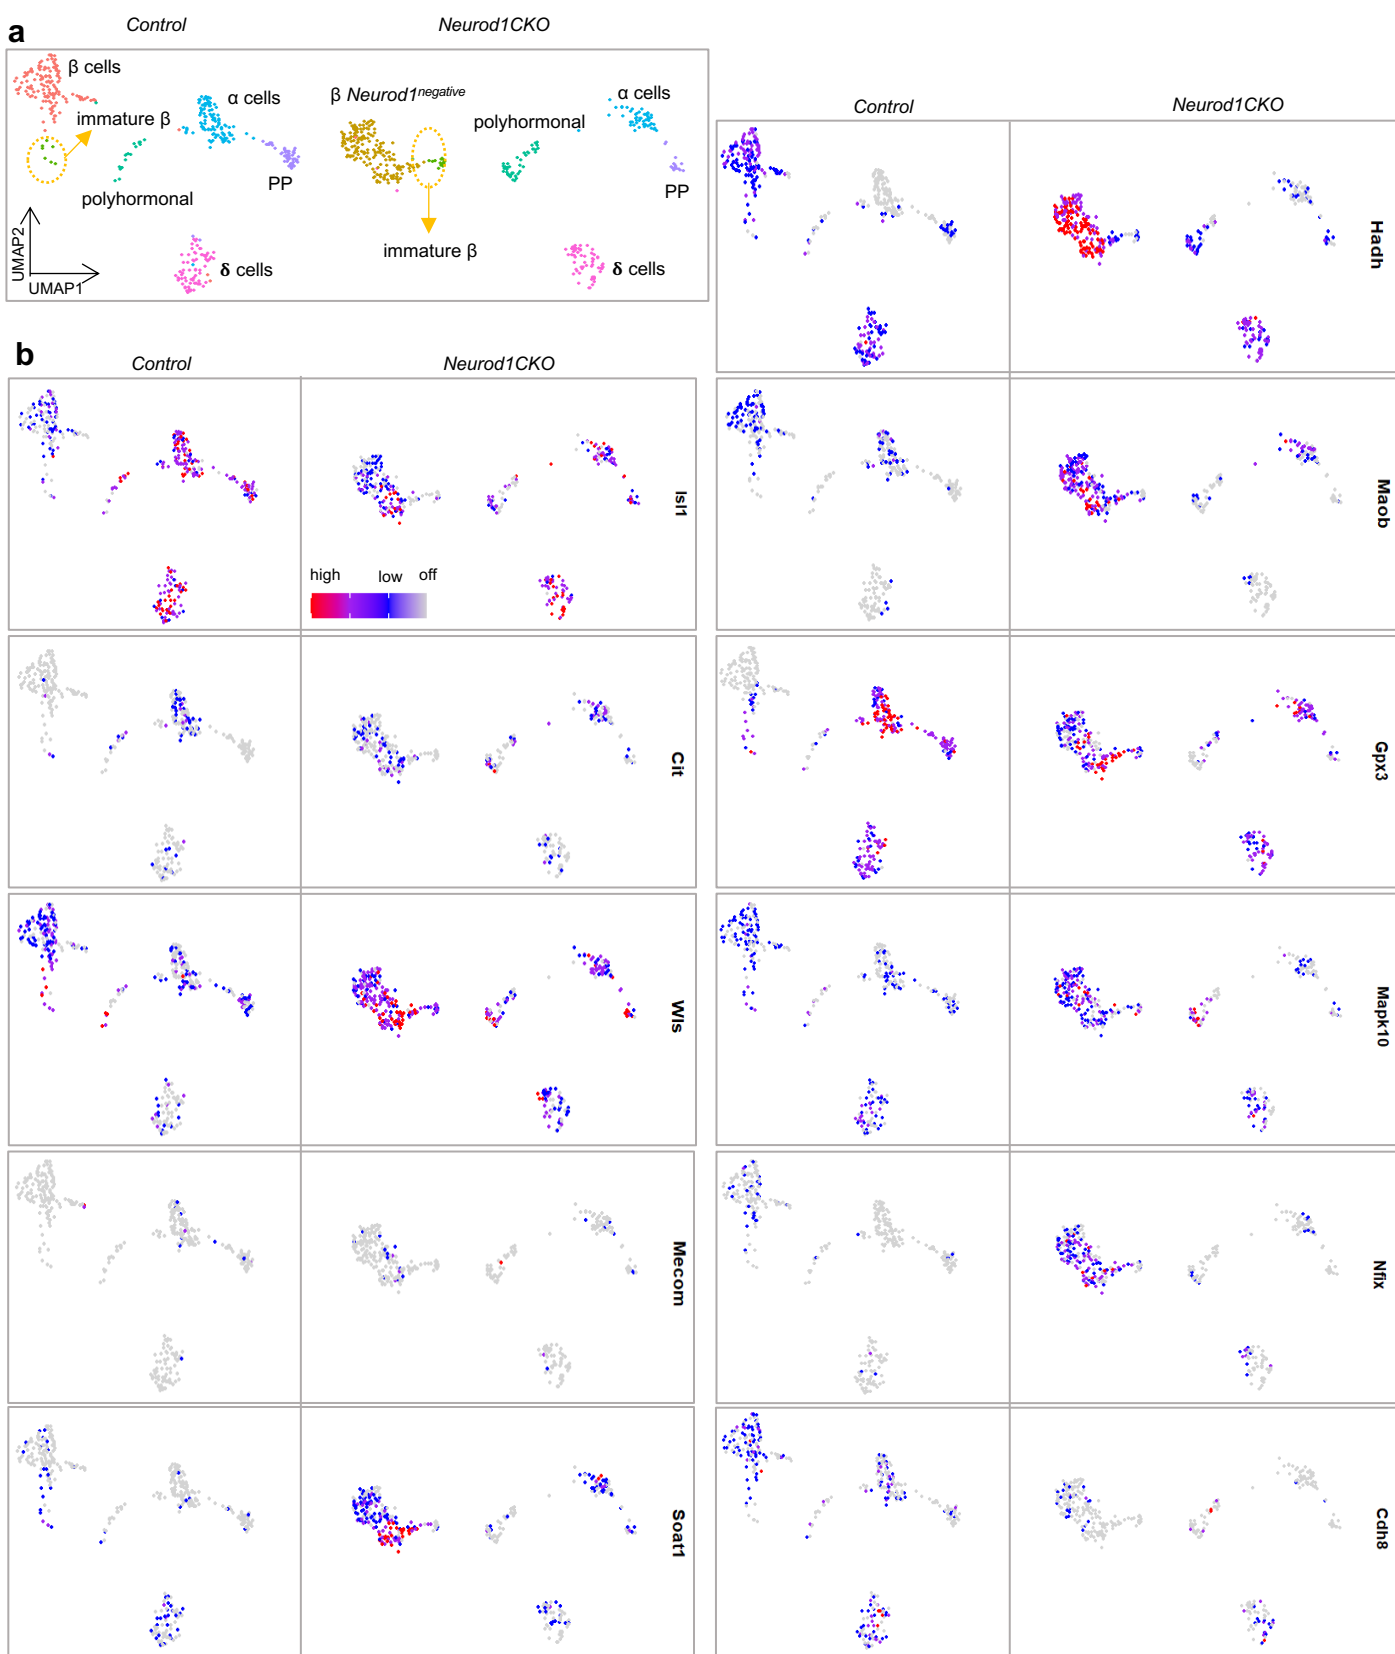

**Supplementary Figure 5. Transcriptome changes in the adult *Neurod1CKO* endocrine cells based on single-cell RNAseq.** (a) UMAP visualization (in two dimensions [UMAP\_1 and UMAP\_2]) of endocrine cells from the adult *Control* and *Neurod1CKO* pancreas (different colors mark distinct cell types annotated based on the expression of signature genes in Fig. 6; each dot represents one cell). Clusters corresponding to  $\alpha$ ,  $\beta$ ,  $\delta$ , PP ( $\gamma$ ), immature  $\beta$ ,  $\beta$  cells not expressing *Neurod1* (in *Neurod1CKO*), and polyhormonal cells are shown in cropped and transformed UMAP plots that excludes a cluster of  $\beta$  cells expressing *Neurod1* (cluster *Neurod1*<sup>positive</sup>) in *Neurod1CKO* plots for easier visualization. (b) Two-dimensional embedding and unsupervised clustering of endocrine profiles in UMAP visualizations of selected genes in *Control* and *Neurod1CKO*.

**Supplementary Table 1.**  
**Primers used for genotyping**

| <b>gene</b>      | <b>sequence</b>       |
|------------------|-----------------------|
| <i>Cre_F</i>     | CCATTTTGCAGTGGACTCCT  |
| <i>Cre_R</i>     | ACGGACAGAAGCATTTCCTCA |
| <i>Neurod1_F</i> | ACCATGCACTCTGTACGCATT |
| <i>Neurod1_R</i> | GAGAACTGAGACTCATCTG   |

**Supplementary Table 2.**  
**Primers used for qPCR**

| <b>gene</b>      | <b>sequence</b>          |
|------------------|--------------------------|
| <i>Cpe_F</i>     | AGCTACCTGGAGCAGATACAC    |
| <i>Cpe_R</i>     | TCGCCAGTAATCCCCATCCT     |
| <i>Gcg_F</i>     | CAGAAGAAGTCGCCATTGCC     |
| <i>Gcg_R</i>     | AAGTCCCTGGTGGCAAGATT     |
| <i>Ins1_F</i>    | GACCAGCTATAATCAGAGACCATC |
| <i>Ins1_R</i>    | GTAGGAAGTGCACCAACAGG     |
| <i>Ins2_F</i>    | GGCTTCTTCTACACACCCAT     |
| <i>Ins2_R</i>    | CCAAGGTCTGAAGGTCACCT     |
| <i>Resp18_F</i>  | AGGATATGAAGGCAGTTTCCCC   |
| <i>Resp18_R</i>  | TTCACCTTGACTGTTGGACTCTTT |
| <i>Scg5_F</i>    | GTTTGGGCAAGTGGAACAAGAA   |
| <i>Scg5_R</i>    | GAGAAGTGGGGGACAGATTTC    |
| <i>Slc2a5_F</i>  | GAATAAACTGGGCAGAAAAGGGG  |
| <i>Slc2a5_R</i>  | TAGGGACCACGTTGGAAGAGA    |
| <i>Smarcd2_F</i> | CAACCATCTGGTGGAGTGGCAT   |
| <i>Smarcd2_R</i> | AGGCGGGGGTCCAGTTTAT      |
| <i>Tox3_F</i>    | GGTACTACGGCTACAGCAAG     |
| <i>Tox3_R</i>    | TGTGGAATGTCTGCTCACTGG    |



**Supplementary Table 3.****Primary and secondary antibodies used for immunohistochemical staining**

| <b>name</b>                                                      | <b>host</b> | <b>manufacturer</b>          | <b>catalogue number</b> | <b>dilution</b> |
|------------------------------------------------------------------|-------------|------------------------------|-------------------------|-----------------|
| anti-alpha-amylase                                               | rabbit      | Sigma-Aldrich                | A8273                   | 1:2500          |
| anti-C peptide 1                                                 | rabbit      | Beta cell consortium         | Ab657                   | 1:1000          |
| anti-C peptide 2                                                 | rabbit      | Beta cell consortium         | Ab1042                  | 1:3000          |
| anti-glucagon                                                    | mouse       | Abcam                        | Ab10988                 | 1:500           |
| anti-glucagon                                                    | goat        | Bio-Rad                      | 4660-1140               | 1:500           |
| anti-insulin                                                     | guinea pig  | Abcam                        | Ab7842                  | 1:50            |
| anti-insulin                                                     | guinea pig  | Genetex                      | GTX27842                | 1:50            |
| anti-ISL1                                                        | mouse       | Developmental Hybridoma bank | 39.4D5                  | 1:200           |
| anti-Ki67                                                        | rabbit      | Cell signalling              | 9129                    | 1:400           |
| anti-NEUROD1                                                     | rabbit      | Abcam                        | Ab109224                | 1:500           |
| anti-PDX1                                                        | rabbit      | Abcam                        | Ab47267                 | 1:2000          |
| anti-PDX1                                                        | mouse       | Developmental Hybridoma bank | F6A11                   | 1:3             |
| anti-SOX9                                                        | rabbit      | Sigma-Aldrich                | AB5535                  | 1:1000          |
| Alexa Fluor® 594-conjugated AffiniPure Anti-Rabbit IgG (H+L)     | donkey      | Jackson ImmunoResearch       | 711-585-152             | 1:500           |
| Alexa Fluor® 488-conjugated AffiniPure Anti-Mouse IgG (H+L)      | donkey      | Jackson ImmunoResearch       | 715-545-150             | 1:500           |
| Alexa Fluor® 647-conjugated AffiniPure Anti-Guinea pig IgG (H+L) | donkey      | Jackson ImmunoResearch       | 706-605-148             | 1:500           |
| Alexa Fluor® 647-conjugated AffiniPure Anti-Goat IgG (H+L)       | donkey      | Jackson ImmunoResearch       | 705-605-147             | 1:500           |
| DyLight 405-conjugated AffiniPure Goat Anti-Guinea Pig IgG (H+L) | goat        | Jackson ImmunoResearch       | 106-475-003             | 1:500           |
| Alexa Fluor® 488 AffiniPure Goat Anti-Mouse IgG (H+L)            | goat        | Jackson ImmunoResearch       | 115-545-146             | 1:500           |
| Alexa Fluor® 594 AffiniPure Goat Anti-Rabbit IgG (H+L)           | goat        | Jackson ImmunoResearch       | 111-585-144             | 1:500           |

**Supplementary Table 4.**  
**Primary antibodies used for LFSM**

| <b>name</b>  | <b>host</b> | <b>manufacturer</b> | <b>catalogue number</b> | <b>dilution</b> |
|--------------|-------------|---------------------|-------------------------|-----------------|
| anti-GLP1    | mouse       | Abcam               | Ab111125                | 1:1000          |
| anti-insulin | guinea pig  | Genetex             | GTX27842                | 1:50            |

**Supplementary Table 5.**  
**Primary antibodies used for CUT&Tag profiling**

| <b>name</b>   | <b>host</b> | <b>manufacturer</b> | <b>catalogue number</b> | <b>dilution</b> |
|---------------|-------------|---------------------|-------------------------|-----------------|
| anti-H3K4me3  | rabbit      | Active Motif        | 39159                   | 1:100           |
| anti-H3K27me3 | rabbit      | Active Motif        | 39155                   | 1:100           |
| IgG           | rabbit      | Active Motif        | 13-0047                 | 0.5 $\mu$ g     |

**Supplementary Table 6.**  
**Scale factors size used in CUT&Tag profiling**

| <b>track</b>          | <b>PCR cycles</b> | <b>cell count</b> | <b>CPM factor</b> | <b>spike-in factor</b> |
|-----------------------|-------------------|-------------------|-------------------|------------------------|
| H3K4me3 control       | 27                | 4000              | 1,009             | 14,49                  |
| H3K4me3 Neurod1ST     | 27                | 4000              | 0,991             | 14,55                  |
| H3K27me3 control      | 25                | 20605             | 0,925             | 25,37                  |
| H3K27me3<br>Neurod1ST | 26                | 4000              | 1,081             | 107,01                 |
| IgG negative control  | 28                | 6370              | 0,780             | NA                     |
